# Supplementary material for: Costs Related to Immunopreventable Diseases: Brazil and Its Geographic Areas (Immunopreventable Diseases’ Costs in Brazil)
Source: Research Square preprint supplement (doi:10.21203/rs.3.rs-641813/v1), 2021-06-28
Supplement: Supplementary file 2 [file 34b5b1cf3bdeb137c3506845.docx]

**TABLE**

**Table 1.** Description of the immunization coverage, discriminated by each vaccine and by Brazilian geographic area, in the period from 2008 to 2021**.**

Source: Unique Health System Information (DATASUS - TABNET), data collected at March 2021.

**Table 2**. Description of the data regarding the hospitalizations, health care costs (total costs, hospital services and professional services), days of hospital stay and deaths, discriminated by immunopreventable disease, in Brazil, in the period from 2008 to 2018

Source: Unique Health System Information (DATASUS - TABNET). Period of the collected data from 2008 to 2018.

**Table 3**. Tendency of the time series analysis from the data regarding the hospitalizations and health care costs (total costs, hospital services and professional services), discriminated by immunopreventable disease and Brazil geographic areas, in the period from 2008 to 2018

Source: Unique Health System Information (DATASUS - TABNET). Period of the collected data from 2008 to 2018.
